# Supplementary material for: pH-Controlled twisted intramolecular charge transfer (TICT) excited state via changing the charge transfer direction
Source: Royal Society of Chemistry journal article supplement (doi:10.1039/b924549a), 2010-01-01
Supplement: b924549a.pdf [file b924549a.pdf]

SUPPORTING INFORMATION

**pH-Controlled Twisted Intramolecular Charge Transfer  
(TICT) Excited State via Changing the Intramolecular  
Charge Transfer Direction**

Guang-Jiu Zhao and Ke-Li Han\*

*State Key Laboratory of Molecular Reaction Dynamics, Dalian Institute of Chemical Physics, Chinese  
Academy of Sciences, Dalian 116023, China*

\* Corresponding author: Tel: +86-411-84379293; Fax: +86-411-84675584;  
E-mail Address: [gjzhao@dicp.ac.cn](mailto:gjzhao@dicp.ac.cn) (G.-J. Zhao); [klhan@dicp.ac.cn](mailto:klhan@dicp.ac.cn) (K.-L. Han).

## **Table of Contents**

**Table S1.** Cartesian coordinates of the optimized geometric conformations for various forms of the isolated MIR at different pH values... ..page. S3-S16

**Table S2.** Cartesian coordinates of the optimized geometric conformations of the hydrogen-bonded complexes with water molecules in the first solvation shell for various forms of MIR... ..page. S17-S30

**Table S3.** Cartesian coordinates of the optimized geometric conformations of the hydrogen-bonded complexes for various forms of MIR with the consideration of COSMO solvation model... ..page. S31-S44

**Table S1.** Cartesian coordinates of the optimized geometric conformations for various forms of the isolated MIR at different pH values.

KETO (Isomer I)

S<sub>0</sub> state

25

|   |             |            |            |
|---|-------------|------------|------------|
| C | -8.6203983  | 3.9649378  | -0.6657543 |
| C | -7.4216054  | 3.2617023  | -0.6377328 |
| C | -7.3211472  | 2.1074195  | 0.1449878  |
| C | -8.4570849  | 1.7361663  | 0.8697236  |
| C | -9.6118021  | 2.5043418  | 0.7683421  |
| N | -9.7082630  | 3.6026847  | 0.0172438  |
| C | -6.0450261  | 1.3536968  | 0.2260608  |
| C | -4.8480894  | 2.0547343  | 0.5330784  |
| C | -3.6258462  | 1.4426776  | 0.6452659  |
| C | -3.4957299  | 0.0040243  | 0.4424231  |
| N | -4.7273566  | -0.6004360 | 0.1193024  |
| C | -5.9477820  | -0.0055155 | 0.0064928  |
| H | -8.7128917  | 4.8602427  | -1.2722945 |
| H | -6.5823671  | 3.6034011  | -1.2310651 |
| H | -8.4411739  | 0.8754189  | 1.5261438  |
| H | -10.5002125 | 2.2274323  | 1.3272728  |
| H | -4.9082862  | 3.1232064  | 0.7026338  |
| C | -2.4575211  | 2.1892233  | 0.9673448  |
| O | -2.4849482  | -0.6674505 | 0.5174183  |
| H | -4.6483826  | -1.5955184 | -0.0521675 |
| C | -7.0733913  | -0.9186554 | -0.3800506 |
| H | -7.9268612  | -0.3593561 | -0.7541888 |
| H | -7.4060532  | -1.5119920 | 0.4768738  |
| H | -6.7473812  | -1.6140017 | -1.1574561 |
| N | -1.5272083  | 2.8204194  | 1.2277865  |

## KETO (Isomer I)

### S<sub>1</sub> state

25

|   |            |            |            |
|---|------------|------------|------------|
| C | -2.2666858 | 2.6051974  | -0.7950115 |
| C | -1.0524257 | 1.9305143  | -0.7595700 |
| C | -0.9459404 | 0.7536882  | -0.0079364 |
| C | -2.0940379 | 0.3277859  | 0.6723945  |
| C | -3.2558955 | 1.0827669  | 0.5803573  |
| N | -3.3586727 | 2.2022862  | -0.1413996 |
| C | 0.3351341  | 0.0266188  | 0.0854214  |
| C | 1.4941292  | 0.7362125  | 0.3687973  |
| C | 2.7673605  | 0.0638071  | 0.4703272  |
| C | 2.7949144  | -1.3490074 | 0.4236176  |
| N | 1.5829398  | -2.0050174 | 0.2353569  |
| C | 0.3957309  | -1.3905678 | -0.0980790 |
| H | -2.3684542 | 3.5121986  | -1.3822025 |
| H | -0.2067762 | 2.3009706  | -1.3250043 |
| H | -2.0738026 | -0.5601558 | 1.2920442  |
| H | -4.1491209 | 0.7748925  | 1.1146355  |
| H | 1.4501295  | 1.8003556  | 0.5478042  |
| C | 3.9529785  | 0.7801685  | 0.7143583  |
| O | 3.8056568  | -2.0851269 | 0.5344859  |
| H | 1.6689486  | -3.0112015 | 0.1589635  |
| C | -0.6577058 | -2.2689339 | -0.6785697 |
| H | -1.5401608 | -1.7011853 | -0.9606732 |
| H | -0.9721960 | -3.0541715 | 0.0231255  |
| H | -0.2869847 | -2.7799741 | -1.5775565 |
| N | 4.9032673  | 1.4170558  | 0.9060204  |

## KETO (Isomer II)

### S<sub>0</sub> state

25

|   |             |            |            |
|---|-------------|------------|------------|
| C | -8.9382145  | 3.8038408  | 0.8031058  |
| C | -7.7392363  | 3.1130062  | 0.9333079  |
| C | -7.4398976  | 2.0816751  | 0.0373505  |
| C | -8.3854316  | 1.8170013  | -0.9573037 |
| C | -9.5587601  | 2.5620606  | -0.9985755 |
| N | -9.8461391  | 3.5415061  | -0.1396157 |
| C | -6.1524862  | 1.3494814  | 0.1293823  |
| C | -4.9431433  | 2.0900798  | 0.2114262  |
| C | -3.7052897  | 1.5048067  | 0.2913921  |
| C | -3.5722165  | 0.0526630  | 0.3065053  |
| N | -4.8222429  | -0.5957669 | 0.2359588  |
| C | -6.0573201  | -0.0276123 | 0.1518785  |
| H | -9.1837500  | 4.6042875  | 1.4937095  |
| H | -7.0552691  | 3.3681826  | 1.7336047  |
| H | -8.2051162  | 1.0599755  | -1.7100422 |
| H | -10.2996871 | 2.3680926  | -1.7677440 |
| H | -5.0021312  | 3.1716606  | 0.1912969  |
| C | -2.5246041  | 2.2975725  | 0.3524873  |
| O | -2.5481752  | -0.5991491 | 0.3745032  |
| H | -4.7473783  | -1.6053174 | 0.2663771  |
| C | -7.2064822  | -0.9911436 | 0.1087330  |
| H | -8.1339122  | -0.5158722 | 0.4180599  |
| H | -7.0162161  | -1.8418911 | 0.7664782  |
| H | -7.3484307  | -1.3817930 | -0.9031609 |
| N | -1.5883155  | 2.9707412  | 0.3988287  |

## KETO (Isomer II)

### S<sub>1</sub> state

25

|   |             |            |            |
|---|-------------|------------|------------|
| C | -8.9812661  | 3.8120687  | 0.7813222  |
| C | -7.7635372  | 3.1557647  | 0.9133477  |
| C | -7.4498354  | 2.1129306  | 0.0326158  |
| C | -8.4017236  | 1.7996035  | -0.9463517 |
| C | -9.5829124  | 2.5275278  | -1.0010957 |
| N | -9.8863697  | 3.5152143  | -0.1540120 |
| C | -6.1563713  | 1.4079767  | 0.1176328  |
| C | -4.9883447  | 2.1495199  | 0.2240186  |
| C | -3.7025065  | 1.4985425  | 0.2966832  |
| C | -3.6373175  | 0.0982189  | 0.1094221  |
| N | -4.8390571  | -0.5750699 | -0.0871985 |
| C | -6.0898887  | -0.0209202 | 0.0742403  |
| H | -9.2450785  | 4.6133138  | 1.4642130  |
| H | -7.0769738  | 3.4347819  | 1.7023306  |
| H | -8.2099482  | 1.0241181  | -1.6773240 |
| H | -10.3220511 | 2.3096476  | -1.7654577 |
| H | -5.0271109  | 3.2288552  | 0.2175281  |
| C | -2.5183271  | 2.2441302  | 0.4400882  |
| O | -2.6026203  | -0.6113459 | 0.1005736  |
| H | -4.7387414  | -1.5800831 | -0.1622881 |
| C | -7.2188127  | -0.9783070 | 0.2409161  |
| H | -8.1483495  | -0.4621541 | 0.4658158  |
| H | -7.0168019  | -1.6771782 | 1.0636084  |
| H | -7.3820864  | -1.5884914 | -0.6588204 |
| N | -1.5764358  | 2.9085602  | 0.5691709  |

## ENOL (Isomer I)

### S<sub>0</sub> state

25

|   |            |            |            |
|---|------------|------------|------------|
| C | -2.4780934 | 2.3780897  | -0.9895925 |
| C | -1.2478656 | 1.7312731  | -0.9503830 |
| C | -1.0722207 | 0.6445185  | -0.0891018 |
| C | -2.1679594 | 0.2753893  | 0.6953070  |
| C | -3.3569780 | 0.9863699  | 0.5808092  |
| N | -3.5256571 | 2.0224616  | -0.2434453 |
| C | 0.2389124  | -0.0479734 | 0.0059046  |
| C | 1.3892081  | 0.7055311  | 0.2433419  |
| C | 2.6381256  | 0.0999596  | 0.3499443  |
| C | 2.6747097  | -1.2997247 | 0.2075692  |
| N | 1.5989958  | -2.0222897 | -0.0395522 |
| C | 0.3962090  | -1.4397374 | -0.1459967 |
| H | -2.6297303 | 3.2208088  | -1.6568634 |
| H | -0.4424299 | 2.0629411  | -1.5944228 |
| H | -2.0965843 | -0.5416494 | 1.4018439  |
| H | -4.2149502 | 0.7131440  | 1.1872043  |
| H | 1.3155100  | 1.7789751  | 0.3630532  |
| C | 3.8162015  | 0.8593356  | 0.6013145  |
| O | 3.8524889  | -1.9344940 | 0.3177689  |
| C | -0.7387773 | -2.3752406 | -0.4575104 |
| H | -1.5527824 | -1.8775823 | -0.9816422 |
| H | -1.1463848 | -2.8040968 | 0.4629357  |
| H | -0.3650726 | -3.2018182 | -1.0605648 |
| N | 4.7576386  | 1.4944127  | 0.8059296  |
| H | 3.6811428  | -2.8793528 | 0.1852591  |

## ENOL (Isomer I)

### S<sub>1</sub> state

25

|   |            |            |            |
|---|------------|------------|------------|
| C | -2.4372343 | 2.5089271  | -0.7408084 |
| C | -1.2053850 | 1.8769815  | -0.7413483 |
| C | -1.0630362 | 0.6150571  | -0.1072305 |
| C | -2.2203575 | 0.1138740  | 0.5371225  |
| C | -3.3952346 | 0.8403364  | 0.4942818  |
| N | -3.5233779 | 2.0197434  | -0.1334811 |
| C | 0.2177134  | -0.0566913 | -0.0829078 |
| C | 1.3979893  | 0.7599407  | -0.0898415 |
| C | 2.6591365  | 0.1266376  | 0.1167597  |
| C | 2.6405821  | -1.2929701 | 0.2262964  |
| N | 1.5698045  | -2.0660522 | 0.1086818  |
| C | 0.3511553  | -1.4793518 | -0.0547085 |
| H | -2.5611421 | 3.4623098  | -1.2435532 |
| H | -0.3688451 | 2.3250332  | -1.2587306 |
| H | -2.1816372 | -0.8052200 | 1.1028787  |
| H | -4.2831221 | 0.4729813  | 0.9973963  |
| H | 1.3267211  | 1.8322796  | 0.0025974  |
| C | 3.8433257  | 0.8561262  | 0.3009849  |
| O | 3.7961083  | -1.9120411 | 0.4684785  |
| C | -0.7420741 | -2.4577283 | -0.3563721 |
| H | -1.6335720 | -2.0009885 | -0.7769771 |
| H | -1.0226491 | -3.0223049 | 0.5421668  |
| H | -0.3604485 | -3.1963032 | -1.0672508 |
| N | 4.8029610  | 1.4985500  | 0.4367283  |
| H | 3.5951225  | -2.8622944 | 0.5247319  |



## ENOL (Isomer II)

### S<sub>0</sub> state

25

|   |             |            |            |
|---|-------------|------------|------------|
| C | -9.0109338  | 3.7390533  | 0.7864970  |
| C | -7.8022601  | 3.0709062  | 0.9470190  |
| C | -7.4314345  | 2.0932680  | 0.0192488  |
| C | -8.3182314  | 1.8505473  | -1.0325978 |
| C | -9.5052714  | 2.5707604  | -1.1017256 |
| N | -9.8609562  | 3.5018501  | -0.2142946 |
| C | -6.1298185  | 1.3865057  | 0.1377081  |
| C | -4.9605381  | 2.1377882  | 0.2625376  |
| C | -3.7167709  | 1.5226150  | 0.3702057  |
| C | -3.7048053  | 0.1156473  | 0.3412350  |
| N | -4.8036511  | -0.6078249 | 0.2471240  |
| C | -6.0029799  | -0.0167705 | 0.1492796  |
| H | -9.3126050  | 4.4994837  | 1.4999420  |
| H | -7.1659050  | 3.3013915  | 1.7929160  |
| H | -8.0844723  | 1.1257260  | -1.8020689 |
| H | -10.2017795 | 2.3953952  | -1.9156174 |
| H | -5.0122742  | 3.2191271  | 0.2635238  |
| C | -2.5178195  | 2.2787602  | 0.5032396  |
| O | -2.5287162  | -0.5261791 | 0.4226421  |
| C | -7.1713739  | -0.9604204 | 0.0778441  |
| H | -8.0823553  | -0.5253100 | 0.4852961  |
| H | -6.9264527  | -1.8715327 | 0.6222149  |
| H | -7.3725468  | -1.2453515 | -0.9592192 |
| N | -1.5571829  | 2.9077494  | 0.6169294  |
| H | -2.7191752  | -1.4762810 | 0.3961540  |

## ENOL (Isomer II)

### S<sub>1</sub> state

25

|   |             |            |            |
|---|-------------|------------|------------|
| C | -8.8969151  | 3.8883108  | 0.6729322  |
| C | -7.6887360  | 3.2277224  | 0.8182825  |
| C | -7.4150445  | 2.0814625  | 0.0266605  |
| C | -8.4146342  | 1.7265588  | -0.9113992 |
| C | -9.5743056  | 2.4736529  | -0.9905301 |
| N | -9.8324190  | 3.5394192  | -0.2165168 |
| C | -6.1533807  | 1.3848312  | 0.1484654  |
| C | -5.0033476  | 2.1539380  | 0.5315709  |
| C | -3.7231029  | 1.5276001  | 0.4762316  |
| C | -3.7125608  | 0.1452478  | 0.1357849  |
| N | -4.7810931  | -0.6045529 | -0.0976789 |
| C | -6.0096250  | -0.0162065 | -0.0936361 |
| H | -9.1261365  | 4.7490365  | 1.2924047  |
| H | -6.9780872  | 3.5600743  | 1.5618624  |
| H | -8.2595967  | 0.9091153  | -1.5993927 |
| H | -10.3371246 | 2.2214234  | -1.7190978 |
| H | -5.0605479  | 3.2280934  | 0.6104160  |
| C | -2.5294579  | 2.2435001  | 0.6533334  |
| O | -2.5300952  | -0.4629064 | 0.0406372  |
| C | -7.1357780  | -0.9979018 | -0.2037558 |
| H | -8.0942858  | -0.6019935 | 0.1207517  |
| H | -6.8937952  | -1.8722495 | 0.4067943  |
| H | -7.2360710  | -1.3675925 | -1.2325651 |
| N | -1.5645778  | 2.8711977  | 0.8176495  |
| H | -2.7129362  | -1.3852218 | -0.2094600 |

## ANION (Isomer I)

### $S_0$ state

24

|   |             |            |            |
|---|-------------|------------|------------|
| C | -8.6256295  | 4.1042291  | -0.2400368 |
| C | -7.4283205  | 3.4090285  | -0.2886209 |
| C | -7.3380641  | 2.1001828  | 0.2281789  |
| C | -8.5362995  | 1.6017235  | 0.7743230  |
| C | -9.6867482  | 2.3763156  | 0.7664140  |
| N | -9.7634309  | 3.6172157  | 0.2717809  |
| C | -6.0713683  | 1.3631504  | 0.2213133  |
| C | -4.8726713  | 2.0606791  | 0.4288546  |
| C | -3.6494603  | 1.4198426  | 0.4602486  |
| C | -3.5757980  | -0.0357204 | 0.2829410  |
| N | -4.7799919  | -0.6777587 | 0.0046999  |
| C | -5.9312622  | -0.0422552 | -0.0089296 |
| H | -8.6810915  | 5.1107207  | -0.6471658 |
| H | -6.5655588  | 3.8721225  | -0.7509206 |
| H | -8.5661065  | 0.6231892  | 1.2323647  |
| H | -10.6035707 | 1.9794998  | 1.1954800  |
| H | -4.9024112  | 3.1302122  | 0.6069787  |
| C | -2.4678117  | 2.1669403  | 0.7086945  |
| O | -2.5197485  | -0.6679461 | 0.3626148  |
| C | -7.1137667  | -0.9207327 | -0.3693904 |
| H | -7.8702746  | -0.3928453 | -0.9524054 |
| H | -7.6012046  | -1.3162121 | 0.5277267  |
| H | -6.7379759  | -1.7716177 | -0.9357213 |
| N | -1.5267317  | 2.8117960  | 0.9109020  |

## ANION (Isomer II)

### S<sub>0</sub> state

24

|   |             |            |            |
|---|-------------|------------|------------|
| C | -8.7843913  | 3.9179963  | 1.0942419  |
| C | -7.5997487  | 3.2006143  | 1.1168748  |
| C | -7.3935143  | 2.1280790  | 0.2245265  |
| C | -8.4696133  | 1.8771636  | -0.6484767 |
| C | -9.6191931  | 2.6504285  | -0.5852255 |
| N | -9.8056049  | 3.6666205  | 0.2648908  |
| C | -6.1309942  | 1.3843523  | 0.2048691  |
| C | -4.9313877  | 2.0658773  | 0.4578369  |
| C | -3.7063955  | 1.4288812  | 0.4245830  |
| C | -3.6289264  | -0.0014158 | 0.1028267  |
| N | -4.8470715  | -0.6550643 | -0.0641052 |
| C | -5.9986705  | -0.0207710 | -0.0325470 |
| H | -8.9308736  | 4.7383931  | 1.7922936  |
| H | -6.8403759  | 3.4555310  | 1.8454774  |
| H | -8.4007246  | 1.1002954  | -1.3965776 |
| H | -10.4397768 | 2.4482951  | -1.2693533 |
| H | -4.9552634  | 3.1327783  | 0.6510061  |
| C | -2.5171400  | 2.1684180  | 0.6588288  |
| O | -2.5597855  | -0.6064809 | -0.0072061 |
| C | -7.2031861  | -0.9281643 | -0.1963567 |
| H | -7.5044778  | -0.9982999 | -1.2467349 |
| H | -8.0690745  | -0.5911709 | 0.3757926  |
| H | -6.9145414  | -1.9278763 | 0.1256195  |
| N | -1.5686433  | 2.8028393  | 0.8591310  |

ANION  
TICT state

24

|   |            |            |            |
|---|------------|------------|------------|
| C | -9.1087683 | 3.4159254  | -0.9081158 |
| C | -7.8915929 | 2.7834739  | -0.9711239 |
| C | -7.3476157 | 2.1616195  | 0.1956773  |
| C | -8.1634835 | 2.2439300  | 1.3666204  |
| C | -9.3677661 | 2.9021638  | 1.3192578  |
| N | -9.9020930 | 3.5184109  | 0.2111627  |
| C | -6.0444535 | 1.4489298  | 0.1803272  |
| C | -4.8569720 | 2.1019152  | 0.4694765  |
| C | -3.6420089 | 1.4171464  | 0.4467407  |
| C | -3.6229167 | -0.0065486 | 0.1086997  |
| N | -4.8213875 | -0.6386598 | -0.1745287 |
| C | -5.9451307 | 0.0360883  | -0.1396193 |
| H | -9.5041377 | 3.8914025  | -1.8031635 |
| H | -7.3500023 | 2.7718460  | -1.9121508 |
| H | -7.8408773 | 1.7986885  | 2.3029366  |
| H | -9.9717538 | 2.9643081  | 2.2219376  |
| H | -4.8832340 | 3.1554398  | 0.7151207  |
| C | -2.4240444 | 2.0752198  | 0.7472842  |
| O | -2.5575736 | -0.6400676 | 0.0752641  |
| C | -7.2048147 | -0.7209908 | -0.4547520 |
| H | -7.7225887 | -0.2690452 | -1.3028939 |
| H | -7.9023461 | -0.6678722 | 0.3834333  |
| H | -6.9591840 | -1.7586074 | -0.6733959 |
| N | -1.4474290 | 2.6408886  | 1.0014561  |

## CATION (Isomer I)

### S<sub>0</sub> state

26

|   |            |            |            |
|---|------------|------------|------------|
| C | -2.3961135 | 2.5240681  | -0.8133051 |
| C | -1.2012560 | 1.8533022  | -0.7721111 |
| C | -1.0861846 | 0.6207442  | -0.0910486 |
| C | -2.2510636 | 0.1299848  | 0.5369748  |
| C | -3.4274217 | 0.8329940  | 0.4768362  |
| N | -3.4796122 | 2.0053886  | -0.1935406 |
| C | 0.2020021  | -0.0685999 | -0.0133786 |
| C | 1.3612855  | 0.7050491  | 0.1694648  |
| C | 2.6046260  | 0.1152534  | 0.2936766  |
| C | 2.6464887  | -1.2973466 | 0.2112667  |
| N | 1.5676794  | -2.0331773 | -0.0067197 |
| C | 0.3627077  | -1.4746216 | -0.1162132 |
| H | -2.5343433 | 3.4619231  | -1.3328281 |
| H | -0.3565825 | 2.2764757  | -1.2969371 |
| H | -2.2301342 | -0.7855498 | 1.1080491  |
| H | -4.3384168 | 0.5076935  | 0.9595490  |
| H | 1.2933972  | 1.7813662  | 0.2611616  |
| C | 3.7755546  | 0.8940012  | 0.5182636  |
| O | 3.8156915  | -1.9043622 | 0.3506138  |
| C | -0.7504013 | -2.4420480 | -0.4117498 |
| H | -1.5727950 | -1.9934219 | -0.9672364 |
| H | -1.1476081 | -2.8662983 | 0.5158553  |
| H | -0.3467845 | -3.2724243 | -0.9888264 |
| N | 4.7022648  | 1.5549703  | 0.7011863  |
| H | 3.6859366  | -2.8629996 | 0.2629721  |
| H | -4.3565220 | 2.5129526  | -0.2296346 |

## CATION (Isomer II)

### S<sub>0</sub> state

26

|   |             |            |            |
|---|-------------|------------|------------|
| C | -8.9127234  | 3.8731178  | 0.7311152  |
| C | -7.7322729  | 3.1893162  | 0.8711822  |
| C | -7.4361599  | 2.0814028  | 0.0461820  |
| C | -8.4048123  | 1.7288031  | -0.9179230 |
| C | -9.5717067  | 2.4412048  | -1.0305262 |
| N | -9.8043549  | 3.4895267  | -0.2095958 |
| C | -6.1585643  | 1.3777730  | 0.1698718  |
| C | -4.9937458  | 2.1361454  | 0.3811796  |
| C | -3.7518689  | 1.5338273  | 0.4528631  |
| C | -3.7217427  | 0.1249638  | 0.3175271  |
| N | -4.8168889  | -0.6033949 | 0.1713626  |
| C | -6.0178248  | -0.0313897 | 0.0916475  |
| H | -9.1888770  | 4.7163071  | 1.3487271  |
| H | -7.0469816  | 3.4995807  | 1.6474357  |
| H | -8.2316083  | 0.9167655  | -1.6076153 |
| H | -10.3335694 | 2.2204101  | -1.7649870 |
| H | -5.0456706  | 3.2153572  | 0.4463465  |
| C | -2.5587950  | 2.2921835  | 0.6230430  |
| O | -2.5463622  | -0.4859393 | 0.3465552  |
| C | -7.1641916  | -0.9987756 | -0.0160583 |
| H | -8.1060985  | -0.5918848 | 0.3478273  |
| H | -6.9220452  | -1.8919095 | 0.5580589  |
| H | -7.2990857  | -1.3192148 | -1.0537901 |
| N | -1.6049446  | 2.9257025  | 0.7572084  |
| H | -2.6852533  | -1.4422468 | 0.2504039  |
| H | -10.6713549 | 4.0063889  | -0.3055509 |

CATION  
TICT state

26

|   |            |            |            |
|---|------------|------------|------------|
| C | -2.8072587 | 1.7727701  | -1.4258753 |
| C | -1.5986178 | 1.1523106  | -1.3381626 |
| C | -1.1117377 | 0.6794676  | -0.0929224 |
| C | -1.9164650 | 0.8966990  | 1.0539300  |
| C | -3.1233532 | 1.5192475  | 0.9530038  |
| N | -3.5805567 | 1.9478100  | -0.2862008 |
| C | 0.2265150  | 0.0194171  | 0.0103192  |
| C | 1.3652737  | 0.7625172  | 0.2273511  |
| C | 2.6173757  | 0.1326976  | 0.3172915  |
| C | 2.6337900  | -1.3059611 | 0.1745592  |
| N | 1.5483427  | -2.0355126 | -0.0364044 |
| C | 0.3720325  | -1.4281765 | -0.1205726 |
| H | -3.2157406 | 2.1495133  | -2.3498497 |
| H | -1.0224842 | 1.0363829  | -2.2462473 |
| H | -1.5927950 | 0.5781184  | 2.0356184  |
| H | -3.7669770 | 1.7064181  | 1.7975408  |
| H | 1.3050545  | 1.8377436  | 0.3290291  |
| C | 3.8087763  | 0.8419575  | 0.5362174  |
| O | 3.7933440  | -1.9027959 | 0.2620864  |
| C | -0.8157842 | -2.2884254 | -0.3473214 |
| H | -1.3922016 | -1.9359942 | -1.2055542 |
| H | -1.4935090 | -2.2208823 | 0.5098395  |
| H | -0.5131692 | -3.3216144 | -0.4916021 |
| N | 4.7866053  | 1.4369854  | 0.7189474  |
| H | 3.6762282  | -2.8663249 | 0.1520033  |
| H | -4.4683955 | 2.4159793  | -0.3548016 |



**Table S2.** Cartesian coordinates of the optimized geometric conformations of the hydrogen-bonded complexes with water molecules in the first solvation shell for various forms of MIR

KETO-3H<sub>2</sub>O (Isomer I)

S<sub>0</sub> state

34

|   |             |            |            |
|---|-------------|------------|------------|
| C | -8.6689232  | 3.8853944  | -0.7056716 |
| C | -7.4545715  | 3.2139358  | -0.6513688 |
| C | -7.3358570  | 2.0725595  | 0.1474290  |
| C | -8.4661740  | 1.6857998  | 0.8732022  |
| C | -9.6386674  | 2.4208629  | 0.7539557  |
| N | -9.7508059  | 3.4994490  | -0.0246670 |
| C | -6.0495054  | 1.3367450  | 0.2330561  |
| C | -4.8666113  | 2.0421826  | 0.5580577  |
| C | -3.6378591  | 1.4321307  | 0.6536300  |
| C | -3.5049776  | 0.0072321  | 0.4103626  |
| N | -4.7173789  | -0.6090249 | 0.0784006  |
| C | -5.9360359  | -0.0210783 | -0.0170052 |
| H | -8.7838222  | 4.7672047  | -1.3268379 |
| H | -6.6193521  | 3.5684539  | -1.2423544 |
| H | -8.4334332  | 0.8346989  | 1.5411172  |
| H | -10.5246468 | 2.1385860  | 1.3129867  |
| H | -4.9350920  | 3.1059044  | 0.7535196  |
| C | -2.4699040  | 2.1725737  | 0.9869062  |
| O | -2.4669424  | -0.6458845 | 0.4646278  |
| H | -4.6206913  | -1.6097411 | -0.1320573 |
| C | -7.0573657  | -0.9342451 | -0.4186779 |
| H | -7.8898206  | -0.3793173 | -0.8436912 |
| H | -7.4279992  | -1.4926808 | 0.4454768  |
| H | -6.7086487  | -1.6638616 | -1.1519855 |
| N | -1.5353744  | 2.7959243  | 1.2466606  |
| O | -12.2753796 | 4.9567562  | -0.3648113 |
| H | -11.4334450 | 4.4874230  | -0.2118956 |
| H | -12.6929968 | 4.4882294  | -1.0940989 |
| O | 0.8730734   | 4.6636121  | 1.5087737  |
| H | 0.0933239   | 4.0904432  | 1.5444104  |
| H | 1.4239584   | 4.2742151  | 0.8225901  |
| O | -3.5196958  | -3.1210346 | -0.1917057 |
| H | -3.1584081  | -3.7799870 | -0.7922780 |
| H | -2.7948731  | -2.5088500 | 0.0411630  |

## KETO-3H<sub>2</sub>O (Isomer I)

### S<sub>1</sub> state

34

|   |             |            |            |
|---|-------------|------------|------------|
| C | -8.6978761  | 3.9059960  | -0.6443760 |
| C | -7.4704523  | 3.2586102  | -0.6266096 |
| C | -7.3360743  | 2.0605894  | 0.0891527  |
| C | -8.4716204  | 1.5902544  | 0.7637473  |
| C | -9.6514359  | 2.3165769  | 0.6950436  |
| N | -9.7765449  | 3.4503425  | -0.0016766 |
| C | -6.0385600  | 1.3639445  | 0.1508348  |
| C | -4.8957186  | 2.1110507  | 0.4267201  |
| C | -3.6151762  | 1.4619325  | 0.5521740  |
| C | -3.5468863  | 0.0510849  | 0.4236588  |
| N | -4.7155983  | -0.6330384 | 0.1486476  |
| C | -5.9423478  | -0.0476727 | -0.0547866 |
| H | -8.8261472  | 4.8293280  | -1.1989711 |
| H | -6.6344471  | 3.6664874  | -1.1797037 |
| H | -8.4297320  | 0.6899543  | 1.3625864  |
| H | -10.5368359 | 1.9800498  | 1.2236017  |
| H | -4.9698994  | 3.1703569  | 0.6220134  |
| C | -2.4553146  | 2.1878882  | 0.8640859  |
| O | -2.4954326  | -0.6341751 | 0.5388732  |
| H | -4.5945843  | -1.6450464 | 0.0208251  |
| C | -7.0202458  | -0.9604231 | -0.5310765 |
| H | -7.9010337  | -0.4112674 | -0.8518945 |
| H | -7.3280066  | -1.6726134 | 0.2468914  |
| H | -6.6684237  | -1.5593366 | -1.3796466 |
| N | -1.5283733  | 2.8386188  | 1.1136436  |
| O | -12.2325066 | 5.0655255  | -0.0506493 |
| H | -11.4244352 | 4.5202274  | -0.0128105 |
| H | -12.7108438 | 4.7523504  | -0.8243525 |
| O | 0.7827600   | 4.7385872  | 1.4855822  |
| H | -0.0044176  | 4.1803513  | 1.3886802  |
| H | 1.5168744   | 4.1165588  | 1.4945857  |
| O | -3.5961885  | -3.2300707 | 0.0987805  |
| H | -3.3193981  | -3.9409147 | -0.4882473 |
| H | -2.8055529  | -2.7048013 | 0.3011409  |

## KETO-3H<sub>2</sub>O (Isomer II)

### S<sub>0</sub> state

34

|   |             |            |            |
|---|-------------|------------|------------|
| C | -9.4029522  | 2.7329105  | -0.9369544 |
| C | -8.2144127  | 2.0141221  | -0.9501235 |
| C | -7.3684032  | 2.0649747  | 0.1613101  |
| C | -7.7746404  | 2.8660699  | 1.2331443  |
| C | -8.9791370  | 3.5528113  | 1.1527855  |
| N | -9.7894672  | 3.4899471  | 0.0934322  |
| C | -6.0734316  | 1.3408035  | 0.2041732  |
| C | -4.8900910  | 2.0555226  | 0.5060655  |
| C | -3.6522202  | 1.4593075  | 0.5597375  |
| C | -3.5115340  | 0.0365849  | 0.3115415  |
| N | -4.7294323  | -0.5957488 | 0.0359791  |
| C | -5.9569147  | -0.0206467 | -0.0212599 |
| H | -10.0729133 | 2.7146434  | -1.7900983 |
| H | -7.9445825  | 1.4427428  | -1.8289998 |
| H | -7.1702260  | 2.9438739  | 2.1284530  |
| H | -9.3114013  | 4.1765380  | 1.9756977  |
| H | -4.9605389  | 3.1213026  | 0.6880763  |
| C | -2.4842488  | 2.2149494  | 0.8546563  |
| O | -2.4655700  | -0.6059709 | 0.3351984  |
| H | -4.6358335  | -1.6065992 | -0.1207226 |
| C | -7.0907027  | -0.9611139 | -0.3062202 |
| H | -8.0422958  | -0.5448215 | 0.0141172  |
| H | -6.9309697  | -1.9107511 | 0.2076775  |
| H | -7.1575724  | -1.1737682 | -1.3771437 |
| N | -1.5534021  | 2.8511418  | 1.0951695  |
| O | -12.2474015 | 4.7279178  | -0.8879312 |
| H | -11.4516369 | 4.4153403  | -0.4178974 |
| H | -12.9901922 | 4.3728631  | -0.3900682 |
| O | 0.7800231   | 4.7784563  | 1.5326449  |
| H | 0.0018092   | 4.2107907  | 1.4324191  |
| H | 1.5235563   | 4.2039708  | 1.3256433  |
| O | -3.5314199  | -3.1287267 | -0.0916769 |
| H | -3.1963292  | -3.8049437 | -0.6884181 |
| H | -2.8050115  | -2.4940792 | 0.0638392  |

## KETO-3H<sub>2</sub>O (Isomer II)

### S<sub>1</sub> state

34

|   |             |            |            |
|---|-------------|------------|------------|
| C | -9.4129464  | 2.6920173  | -0.9292062 |
| C | -8.2259844  | 1.9744302  | -0.9205604 |
| C | -7.3717001  | 2.0745459  | 0.1858500  |
| C | -7.7814375  | 2.9085043  | 1.2352853  |
| C | -8.9942833  | 3.5760064  | 1.1380559  |
| N | -9.8041688  | 3.4757707  | 0.0812630  |
| C | -6.0746767  | 1.3766884  | 0.2465372  |
| C | -4.9441959  | 2.1099600  | 0.6030452  |
| C | -3.6444683  | 1.4867176  | 0.6053706  |
| C | -3.5449300  | 0.1119419  | 0.2722659  |
| N | -4.7059786  | -0.5661208 | -0.0444152 |
| C | -5.9648964  | -0.0148097 | -0.0566844 |
| H | -10.0842538 | 2.6456597  | -1.7797358 |
| H | -7.9549082  | 1.3742726  | -1.7792490 |
| H | -7.1722944  | 3.0156049  | 2.1234236  |
| H | -9.3347028  | 4.2165906  | 1.9442961  |
| H | -5.0199867  | 3.1689940  | 0.7976313  |
| C | -2.4807946  | 2.2228781  | 0.8734599  |
| O | -2.4712803  | -0.5486822 | 0.2510018  |
| H | -4.5765563  | -1.5697611 | -0.2201096 |
| C | -7.0812120  | -0.9679324 | -0.3185261 |
| H | -8.0480758  | -0.5273872 | -0.0908144 |
| H | -6.9670114  | -1.8696876 | 0.2941065  |
| H | -7.0999643  | -1.3007568 | -1.3657296 |
| N | -1.5542032  | 2.8822110  | 1.1011343  |
| O | -12.2733254 | 4.6667307  | -0.9339543 |
| H | -11.4768417 | 4.3744140  | -0.4528873 |
| H | -13.0144652 | 4.3854806  | -0.3887872 |
| O | 0.7583118   | 4.7723439  | 1.5453628  |
| H | -0.0316304  | 4.2204173  | 1.4357657  |
| H | 1.4901449   | 4.1849142  | 1.3328917  |
| O | -3.5671930  | -3.1422203 | -0.1619696 |
| H | -3.3270148  | -3.8909751 | -0.7165219 |
| H | -2.7647945  | -2.6115546 | -0.0326289 |

## ENOL-3H<sub>2</sub>O (Isomer I)

### S<sub>0</sub> state

34

|   |            |            |            |
|---|------------|------------|------------|
| C | -2.5261095 | 2.2994885  | -1.0299988 |
| C | -1.2874279 | 1.6707272  | -1.0099744 |
| C | -1.0820183 | 0.5872666  | -0.1511879 |
| C | -2.1547954 | 0.2045087  | 0.6588990  |
| C | -3.3564933 | 0.8942934  | 0.5682998  |
| N | -3.5509780 | 1.9219780  | -0.2618598 |
| C | 0.2372089  | -0.0927696 | -0.0823308 |
| C | 1.3820640  | 0.6656596  | 0.1694123  |
| C | 2.6310923  | 0.0651465  | 0.2648758  |
| C | 2.6980076  | -1.3371005 | 0.1002944  |
| N | 1.6135429  | -2.0576770 | -0.1740730 |
| C | 0.4072633  | -1.4763248 | -0.2695321 |
| H | -2.7093064 | 3.1399751  | -1.6909465 |
| H | -0.4986991 | 2.0139494  | -1.6679708 |
| H | -2.0542446 | -0.6074699 | 1.3675471  |
| H | -4.1987457 | 0.6167794  | 1.1931382  |
| H | 1.3003923  | 1.7361321  | 0.3106961  |
| C | 3.8039426  | 0.8263272  | 0.5279759  |
| O | 3.8761439  | -1.9329844 | 0.2160278  |
| C | -0.7224962 | -2.4086152 | -0.6116691 |
| H | -0.3660184 | -3.1706500 | -1.3048920 |
| H | -1.0778943 | -2.9255166 | 0.2847379  |
| H | -1.5683526 | -1.8892747 | -1.0570069 |
| N | 4.7432871  | 1.4614284  | 0.7353590  |
| H | 3.7788405  | -2.9131814 | 0.0937685  |
| O | -5.9237134 | 3.6060780  | -0.6118745 |
| H | -6.4674523 | 3.1209902  | -1.2401284 |
| H | -5.1663358 | 3.0188392  | -0.4262405 |
| O | 3.0864556  | -4.4760825 | -0.1313846 |
| H | 2.2412702  | -4.0190241 | -0.3020329 |
| H | 3.2592849  | -5.0606213 | -0.8770442 |
| O | 7.1389255  | 3.3582315  | 0.8828328  |
| H | 7.8371943  | 2.7665795  | 0.5857638  |
| H | 6.3458770  | 2.8031045  | 0.9076861  |

## ENOL-3H<sub>2</sub>O (Isomer I)

### S<sub>1</sub> state

34

|   |            |            |            |
|---|------------|------------|------------|
| C | -2.5064479 | 2.3827019  | -0.8041423 |
| C | -1.2554022 | 1.7892173  | -0.7966028 |
| C | -1.0848527 | 0.5213936  | -0.1915586 |
| C | -2.2281058 | -0.0323008 | 0.4271277  |
| C | -3.4278334 | 0.6538358  | 0.3853837  |
| N | -3.5827672 | 1.8352774  | -0.2284753 |
| C | 0.2179532  | -0.1196609 | -0.1731111 |
| C | 1.3703773  | 0.7195663  | -0.0938556 |
| C | 2.6462600  | 0.1058433  | 0.0684397  |
| C | 2.6820702  | -1.3227171 | 0.0715130  |
| N | 1.6150781  | -2.1088388 | -0.1107327 |
| C | 0.3825570  | -1.5388687 | -0.2380778 |
| H | -2.6605182 | 3.3423181  | -1.2851156 |
| H | -0.4259970 | 2.2776273  | -1.2888596 |
| H | -2.1656798 | -0.9629829 | 0.9715264  |
| H | -4.3093002 | 0.2488223  | 0.8698518  |
| H | 1.2699008  | 1.7832504  | 0.0534372  |
| C | 3.8104151  | 0.8509005  | 0.2982503  |
| O | 3.8521882  | -1.8974870 | 0.2611926  |
| C | -0.6941544 | -2.5182568 | -0.5927048 |
| H | -0.3120476 | -3.2021692 | -1.3567625 |
| H | -0.9622508 | -3.1419626 | 0.2699683  |
| H | -1.5967971 | -2.0526680 | -0.9776262 |
| N | 4.7520807  | 1.5090017  | 0.4728389  |
| H | 3.7539341  | -2.8989388 | 0.2451214  |
| O | -5.8149728 | 3.7256608  | -0.5806631 |
| H | -6.3770985 | 3.3688925  | -1.2752590 |
| H | -5.1682330 | 3.0230106  | -0.3878506 |
| O | 3.1257776  | -4.4225949 | 0.1473008  |
| H | 2.2682173  | -3.9961466 | -0.0604668 |
| H | 3.3334539  | -5.0365010 | -0.5655402 |
| O | 7.0859049  | 3.3659777  | 0.8738194  |
| H | 7.7935462  | 2.7278722  | 1.0076544  |
| H | 6.2934710  | 2.8223111  | 0.7407820  |

## ENOL-3H<sub>2</sub>O (Isomer II)

### S<sub>0</sub> state

34

|   |            |            |            |
|---|------------|------------|------------|
| C | -3.1089682 | 1.1635592  | -1.3038175 |
| C | -1.8965253 | 0.4871500  | -1.2699675 |
| C | -1.0840603 | 0.5942529  | -0.1385494 |
| C | -1.5472660 | 1.3985327  | 0.9061811  |
| C | -2.7748826 | 2.0370379  | 0.7812448  |
| N | -3.5513494 | 1.9249442  | -0.2987883 |
| C | 0.2356758  | -0.0833752 | -0.0508004 |
| C | 1.3814145  | 0.6797998  | 0.1781848  |
| C | 2.6340195  | 0.0831766  | 0.2558119  |
| C | 2.7023291  | -1.3196775 | 0.0980572  |
| N | 1.6086271  | -2.0514822 | -0.1002470 |
| C | 0.3985464  | -1.4746869 | -0.1722025 |
| H | -3.7548565 | 1.1044543  | -2.1734601 |
| H | -1.5831577 | -0.0982097 | -2.1250157 |
| H | -0.9671352 | 1.5163638  | 1.8129833  |
| H | -3.1535810 | 2.6622301  | 1.5827901  |
| H | 1.3023618  | 1.7546531  | 0.2833070  |
| C | 3.8095019  | 0.8544103  | 0.4747057  |
| O | 3.8890152  | -1.9073171 | 0.1590151  |
| C | -0.7513456 | -2.4246410 | -0.3662344 |
| H | -0.8639769 | -2.6803320 | -1.4241411 |
| H | -0.5525365 | -3.3502740 | 0.1740235  |
| H | -1.6952314 | -2.0064227 | -0.0227893 |
| N | 4.7476228  | 1.5009030  | 0.6500244  |
| H | 3.7922397  | -2.8891774 | 0.0499717  |
| O | -6.0278225 | 3.0313348  | -1.3769232 |
| H | -6.7659553 | 2.6385975  | -0.9008189 |
| H | -5.2321750 | 2.7650266  | -0.8784635 |
| O | 3.0931149  | -4.4558795 | -0.1359607 |
| H | 2.2393365  | -3.9972438 | -0.2535970 |
| H | 3.2219245  | -5.0337147 | -0.8955968 |
| O | 7.1185229  | 3.4087460  | 0.9425213  |
| H | 7.8560845  | 2.7910169  | 0.9415914  |
| H | 6.3324368  | 2.8485320  | 0.8645796  |

## ENOL-3H<sub>2</sub>O (Isomer II)

### S<sub>1</sub> state

34

|   |            |            |            |
|---|------------|------------|------------|
| C | -3.2272749 | 0.9257155  | -1.0827197 |
| C | -2.0465210 | 0.2093293  | -1.0131725 |
| C | -1.0737567 | 0.5541397  | -0.0477200 |
| C | -1.3846043 | 1.6571448  | 0.7840004  |
| C | -2.6054410 | 2.2950211  | 0.6483159  |
| N | -3.5191721 | 1.9484901  | -0.2644940 |
| C | 0.2067672  | -0.1191503 | 0.0703177  |
| C | 1.3364198  | 0.6685729  | 0.4493176  |
| C | 2.6246799  | 0.0613639  | 0.4269725  |
| C | 2.6817161  | -1.3258424 | 0.0882522  |
| N | 1.6141960  | -2.0870610 | -0.1754370 |
| C | 0.3743929  | -1.5172078 | -0.1774742 |
| H | -3.9805405 | 0.6897182  | -1.8262505 |
| H | -1.8598815 | -0.5767035 | -1.7298193 |
| H | -0.6920373 | 1.9775443  | 1.5497439  |
| H | -2.8639054 | 3.1263205  | 1.2949276  |
| H | 1.2564088  | 1.7399365  | 0.5445404  |
| C | 3.7989745  | 0.7944523  | 0.6423802  |
| O | 3.8728220  | -1.8870910 | 0.0432824  |
| C | -0.7389125 | -2.5108432 | -0.3081638 |
| H | -0.8067100 | -2.8985492 | -1.3334341 |
| H | -0.5202868 | -3.3718553 | 0.3308672  |
| H | -1.7102337 | -2.1157567 | -0.0243099 |
| N | 4.7430403  | 1.4440289  | 0.8355151  |
| H | 3.7892833  | -2.8598886 | -0.1984246 |
| O | -6.0251114 | 2.5569138  | -1.6015098 |
| H | -6.8017682 | 2.7767349  | -1.0781669 |
| H | -5.2751212 | 2.5746064  | -0.9807567 |
| O | 3.1659902  | -4.3590232 | -0.5170805 |
| H | 2.2879268  | -3.9234557 | -0.5377118 |
| H | 3.2858992  | -4.8254030 | -1.3514291 |
| O | 7.0438313  | 3.3892672  | 0.9047726  |
| H | 7.7772629  | 2.7891855  | 1.0717865  |
| H | 6.2625141  | 2.8142579  | 0.8861493  |



## ANION-3H<sub>2</sub>O (Isomer I)

### S<sub>0</sub> state

33

|   |             |            |            |
|---|-------------|------------|------------|
| C | -8.6823531  | 4.0816159  | -0.2717853 |
| C | -7.4803015  | 3.3969492  | -0.3180234 |
| C | -7.3797492  | 2.0946857  | 0.2087642  |
| C | -8.5653187  | 1.5817928  | 0.7660462  |
| C | -9.7242531  | 2.3408321  | 0.7612606  |
| N | -9.8063913  | 3.5763203  | 0.2525609  |
| C | -6.1038369  | 1.3695880  | 0.2025792  |
| C | -4.9182334  | 2.0729457  | 0.4504600  |
| C | -3.6914222  | 1.4380840  | 0.4866984  |
| C | -3.6053082  | -0.0058700 | 0.2755671  |
| N | -4.7952369  | -0.6512690 | -0.0380528 |
| C | -5.9547898  | -0.0249680 | -0.0639910 |
| H | -8.7579216  | 5.0832653  | -0.6838877 |
| H | -6.6228244  | 3.8631485  | -0.7861515 |
| H | -8.5777881  | 0.6057371  | 1.2302469  |
| H | -10.6367654 | 1.9477389  | 1.1992961  |
| H | -4.9599458  | 3.1373241  | 0.6529100  |
| C | -2.5143925  | 2.1775163  | 0.7599511  |
| O | -2.5393153  | -0.6302682 | 0.3551825  |
| C | -7.1222180  | -0.8976731 | -0.4734505 |
| H | -6.7473378  | -1.6924454 | -1.1168911 |
| H | -7.5799531  | -1.3748141 | 0.3984747  |
| H | -7.9004297  | -0.3421265 | -0.9970060 |
| N | -1.5715657  | 2.8117978  | 0.9766744  |
| O | -12.3772146 | 4.8576173  | 0.1832971  |
| H | -11.4745901 | 4.4759375  | 0.2677635  |
| H | -12.6923414 | 4.5222697  | -0.6616593 |
| O | -3.4221013  | -3.3359641 | -0.2155146 |
| H | -4.1937307  | -2.7487653 | -0.2591390 |
| H | -2.7511969  | -2.6667032 | -0.0003414 |
| O | 0.9290377   | 4.3634999  | 0.9072039  |
| H | 0.0706250   | 3.9258417  | 1.0528510  |
| H | 1.3475624   | 3.8088359  | 0.2413551  |

## ANION-3H<sub>2</sub>O (Isomer II)

### S<sub>0</sub> state

33

|   |             |            |            |
|---|-------------|------------|------------|
| C | -9.6198551  | 2.5497720  | -0.6974344 |
| C | -8.4432328  | 1.8200581  | -0.7334001 |
| C | -7.4291726  | 2.0624615  | 0.2107063  |
| C | -7.7078546  | 3.0811806  | 1.1421362  |
| C | -8.9124340  | 3.7617473  | 1.0960921  |
| N | -9.8742515  | 3.5117089  | 0.1981077  |
| C | -6.1455217  | 1.3519653  | 0.2205830  |
| C | -4.9706654  | 2.0667005  | 0.4857786  |
| C | -3.7316839  | 1.4547283  | 0.4763267  |
| C | -3.6196181  | 0.0268128  | 0.1818261  |
| N | -4.8156202  | -0.6549627 | -0.0091533 |
| C | -5.9855609  | -0.0483240 | -0.0044051 |
| H | -10.3986917 | 2.3667576  | -1.4315503 |
| H | -8.3047254  | 1.0842988  | -1.5129302 |
| H | -6.9919922  | 3.3212789  | 1.9181656  |
| H | -9.1290012  | 4.5420471  | 1.8193202  |
| H | -5.0242779  | 3.1341894  | 0.6689159  |
| C | -2.5582007  | 2.2123320  | 0.7111536  |
| O | -2.5312714  | -0.5588249 | 0.1143312  |
| C | -7.1681136  | -0.9753552 | -0.1912348 |
| H | -6.8966767  | -1.9609420 | 0.1844407  |
| H | -8.0630030  | -0.6240048 | 0.3225111  |
| H | -7.4134196  | -1.0878912 | -1.2518843 |
| N | -1.6176738  | 2.8570307  | 0.9058897  |
| O | -12.4119648 | 4.8562918  | 0.1528009  |
| H | -11.5155992 | 4.4513739  | 0.1335636  |
| H | -12.8835086 | 4.3486870  | 0.8203145  |
| O | -3.4569174  | -3.2918191 | -0.3648068 |
| H | -4.2172040  | -2.6881588 | -0.3222103 |
| H | -2.7535516  | -2.6392103 | -0.2153569 |
| O | 0.9320497   | 4.3468305  | 0.9172873  |
| H | 0.0435050   | 3.9541017  | 0.9909976  |
| H | 1.4444942   | 3.6535928  | 0.4898110  |

## ANION-3H<sub>2</sub>O

### TICT state

33

|   |             |            |            |
|---|-------------|------------|------------|
| C | -9.1171948  | 3.4431883  | -0.9508035 |
| C | -7.8835511  | 2.8462780  | -0.9640819 |
| C | -7.3768802  | 2.2242678  | 0.2178786  |
| C | -8.2341834  | 2.2740616  | 1.3590409  |
| C | -9.4530311  | 2.8952875  | 1.2753258  |
| N | -9.9510126  | 3.5001355  | 0.1430399  |
| C | -6.0536893  | 1.5530752  | 0.2512732  |
| C | -4.9009116  | 2.2444788  | 0.5910970  |
| C | -3.6648745  | 1.6009471  | 0.6135679  |
| C | -3.5837263  | 0.1816408  | 0.2769238  |
| N | -4.7502602  | -0.4865559 | -0.0552409 |
| C | -5.9005028  | 0.1443318  | -0.0704541 |
| H | -9.4933722  | 3.9238860  | -1.8487053 |
| H | -7.3001160  | 2.8632121  | -1.8786373 |
| H | -7.9321564  | 1.8325045  | 2.3029522  |
| H | -10.0969224 | 2.9399135  | 2.1483426  |
| H | -4.9725583  | 3.2955216  | 0.8377310  |
| C | -2.4769751  | 2.2933045  | 0.9501171  |
| O | -2.5011116  | -0.4210974 | 0.2839768  |
| C | -7.1168097  | -0.6507816 | -0.4424675 |
| H | -6.8372551  | -1.6779765 | -0.6670577 |
| H | -7.8454733  | -0.6304997 | 0.3701421  |
| H | -7.6158663  | -0.2010324 | -1.3025528 |
| N | -1.5197552  | 2.8795504  | 1.2231798  |
| O | -12.4808574 | 4.6071786  | 0.0597717  |
| H | -11.5351048 | 4.2802370  | 0.1075026  |
| H | -12.9700940 | 3.8135327  | -0.1775018 |
| O | -3.8314794  | -3.2818210 | -0.5461943 |
| H | -4.2686889  | -2.4202118 | -0.4193305 |
| H | -2.9091981  | -3.0643576 | -0.3725410 |
| O | 1.2532471   | 4.0855689  | 1.3816797  |
| H | 0.3197565   | 3.8289372  | 1.4395866  |
| H | 1.6563320   | 3.3648297  | 0.8872086  |

## CATION-3H<sub>2</sub>O (Isomer I)

### S<sub>0</sub> state

35

|   |            |            |            |
|---|------------|------------|------------|
| C | -1.5994824 | 2.8524756  | -0.6098244 |
| C | -0.5064822 | 2.0236638  | -0.6039145 |
| C | -0.6101628 | 0.6978740  | -0.1231880 |
| C | -1.8759041 | 0.2989834  | 0.3572490  |
| C | -2.9396980 | 1.1665966  | 0.3311660  |
| N | -2.7916494 | 2.4161453  | -0.1518319 |
| C | 0.5647176  | -0.1733717 | -0.0924130 |
| C | 1.8158630  | 0.4162199  | 0.1537431  |
| C | 2.9596577  | -0.3536098 | 0.2303909  |
| C | 2.8225891  | -1.7555149 | 0.0628439  |
| N | 1.6485993  | -2.3108781 | -0.2319006 |
| C | 0.5416317  | -1.5751904 | -0.3174029 |
| H | -1.5684070 | 3.8674833  | -0.9804003 |
| H | 0.4308766  | 2.4030610  | -0.9867920 |
| H | -2.0246946 | -0.6801405 | 0.7847835  |
| H | -3.9226164 | 0.9067025  | 0.6985767  |
| H | 1.9115065  | 1.4844025  | 0.3094721  |
| C | 4.2202778  | 0.2644538  | 0.4689105  |
| O | 3.8873535  | -2.5096444 | 0.1897124  |
| C | -0.6825171 | -2.3465521 | -0.7346275 |
| H | -0.3688199 | -3.1829805 | -1.3567189 |
| H | -1.1909557 | -2.7711450 | 0.1366447  |
| H | -1.3983610 | -1.7423745 | -1.2906197 |
| N | 5.2033648  | 0.8425480  | 0.6434335  |
| H | 3.6788107  | -3.4761738 | 0.0633900  |
| O | -5.0116473 | 4.1065454  | -0.1588660 |
| H | -5.2976579 | 4.6803995  | 0.5618381  |
| H | -3.6063425 | 3.0526733  | -0.1639380 |
| O | 3.5349845  | -5.1376417 | -0.0609274 |
| H | 2.8032148  | -5.5447039 | -0.5369660 |
| H | 4.2840108  | -5.7418918 | -0.1153376 |
| O | 3.1250931  | 3.3480640  | 0.1139598  |
| H | 3.2436561  | 4.2635283  | 0.3896283  |
| H | 4.0062405  | 2.9526533  | 0.1722256  |
| H | -5.6385321 | 4.2412730  | -0.8796808 |

## CATION-3H<sub>2</sub>O (Isomer II)

### S<sub>0</sub> state

35

|   |            |            |            |
|---|------------|------------|------------|
| C | -3.1048783 | 1.2749120  | -1.1041095 |
| C | -2.0096965 | 0.4467596  | -1.0898921 |
| C | -0.9297122 | 0.6976126  | -0.2167440 |
| C | -1.0406720 | 1.8368911  | 0.6131275  |
| C | -2.1567555 | 2.6327010  | 0.5634970  |
| N | -3.1663730 | 2.3423185  | -0.2835520 |
| C | 0.2782787  | -0.1275876 | -0.1808165 |
| C | 1.5058074  | 0.5147869  | 0.0516728  |
| C | 2.6867159  | -0.2006794 | 0.0754383  |
| C | 2.6140571  | -1.5999309 | -0.1456770 |
| N | 1.4482925  | -2.2189073 | -0.3225476 |
| C | 0.3035349  | -1.5380697 | -0.3410727 |
| H | -3.9471270 | 1.1283704  | -1.7656986 |
| H | -1.9821432 | -0.3766019 | -1.7862365 |
| H | -0.2550130 | 2.0934919  | 1.3099086  |
| H | -2.2881461 | 3.5047058  | 1.1887118  |
| H | 1.5598325  | 1.5881981  | 0.1931702  |
| C | 3.9202353  | 0.4677716  | 0.3199123  |
| O | 3.7284309  | -2.2903513 | -0.1641224 |
| C | -0.9252869 | -2.3980842 | -0.4749722 |
| H | -1.1740685 | -2.5608757 | -1.5284493 |
| H | -0.7125822 | -3.3748399 | -0.0441599 |
| H | -1.7972762 | -1.9751091 | 0.0224754  |
| N | 4.8736755  | 1.0790034  | 0.5398086  |
| H | 3.5640801  | -3.2644587 | -0.2934482 |
| H | -3.9990405 | 2.9546196  | -0.3121933 |
| O | -5.4141066 | 3.9924186  | -0.4035727 |
| H | -6.2312281 | 3.9050387  | 0.1016146  |
| H | -5.5160163 | 4.7797881  | -0.9514526 |
| O | 3.5237190  | -4.9316057 | -0.4397711 |
| H | 2.7703654  | -5.4057783 | -0.8072825 |
| H | 4.2992552  | -5.4932253 | -0.5489867 |
| O | 2.5996964  | 3.4024633  | 0.9540537  |
| H | 3.4912315  | 3.0405077  | 1.0552541  |
| H | 2.7269534  | 4.3488778  | 0.8268353  |

## CATION-3H<sub>2</sub>O

### TICT state

35

|   |            |            |            |
|---|------------|------------|------------|
| C | -2.1326339 | 2.1506375  | -1.4232256 |
| C | -1.0285158 | 1.3526962  | -1.3975004 |
| C | -0.6059955 | 0.7363633  | -0.1923154 |
| C | -1.3640604 | 0.9993407  | 0.9776277  |
| C | -2.4653116 | 1.7996579  | 0.9306364  |
| N | -2.8634225 | 2.3746487  | -0.2663336 |
| C | 0.6317042  | -0.0999443 | -0.1345730 |
| C | 1.8582701  | 0.4760439  | 0.1265605  |
| C | 3.0006811  | -0.3299727 | 0.2007139  |
| C | 2.8353233  | -1.7545087 | 0.0005851  |
| N | 1.6512611  | -2.3162611 | -0.2699026 |
| C | 0.5818768  | -1.5418388 | -0.3441048 |
| H | -2.4884098 | 2.6394195  | -2.3163635 |
| H | -0.4815367 | 1.2099751  | -2.3198804 |
| H | -1.0825600 | 0.5758163  | 1.9324907  |
| H | -3.0701165 | 2.0250858  | 1.7947197  |
| H | 1.9686614  | 1.5446329  | 0.2752618  |
| C | 4.2756725  | 0.2049917  | 0.4703186  |
| O | 3.8897534  | -2.4935762 | 0.0910977  |
| C | -0.7142378 | -2.2055671 | -0.6560619 |
| H | -0.5678451 | -3.2737298 | -0.7898291 |
| H | -1.4365414 | -2.0271219 | 0.1440458  |
| H | -1.1559226 | -1.7746539 | -1.5577419 |
| N | 5.3149276  | 0.6618668  | 0.6941043  |
| H | 3.6991183  | -3.4899187 | -0.0485611 |
| O | -5.1854909 | 4.1397265  | -0.3047207 |
| H | -5.1959403 | 5.0886753  | -0.1380122 |
| H | -3.6751985 | 2.9857009  | -0.2888628 |
| O | 3.5574026  | -5.0134456 | -0.1904347 |
| H | 2.7432749  | -5.4397400 | -0.4802870 |
| H | 4.2760310  | -5.6534281 | -0.2511631 |
| O | 3.1991140  | 3.3076798  | 0.4737696  |
| H | 2.9127011  | 4.2250910  | 0.4070233  |
| H | 4.1402013  | 3.3456785  | 0.6808643  |
| H | -6.0986254 | 3.8901403  | -0.4842576 |

**Table S3.** Cartesian coordinates of the optimized geometric conformations of the hydrogen-bonded complexes for various forms of MIR with the consideration of COSMO solvation model.

KETO-3H<sub>2</sub>O\_COSMO (Isomer I)

S<sub>0</sub> state

34

|   |             |            |            |
|---|-------------|------------|------------|
| C | -8.6677167  | 3.9102974  | -0.6965133 |
| C | -7.4578904  | 3.2336036  | -0.6544566 |
| C | -7.3423760  | 2.0871737  | 0.1359223  |
| C | -8.4694151  | 1.6885164  | 0.8577094  |
| C | -9.6392162  | 2.4268087  | 0.7515788  |
| N | -9.7480201  | 3.5196136  | -0.0115291 |
| C | -6.0513581  | 1.3598589  | 0.2246173  |
| C | -4.8831674  | 2.0709212  | 0.5473857  |
| C | -3.6523889  | 1.4568428  | 0.6519475  |
| C | -3.5161379  | 0.0390181  | 0.4231935  |
| N | -4.7143281  | -0.5834460 | 0.0928271  |
| C | -5.9328312  | -0.0031584 | -0.0154058 |
| H | -8.7790055  | 4.7962430  | -1.3090925 |
| H | -6.6245524  | 3.5908420  | -1.2431211 |
| H | -8.4406743  | 0.8280227  | 1.5101782  |
| H | -10.5221202 | 2.1341767  | 1.3060694  |
| H | -4.9514218  | 3.1342919  | 0.7327185  |
| C | -2.4889221  | 2.1956608  | 0.9805924  |
| O | -2.4672713  | -0.6141261 | 0.4909367  |
| H | -4.6194676  | -1.5876988 | -0.0952070 |
| C | -7.0502951  | -0.9163889 | -0.4115686 |
| H | -7.8482967  | -0.3724540 | -0.9078839 |
| H | -7.4700186  | -1.4069632 | 0.4690426  |
| H | -6.6852674  | -1.6940611 | -1.0812400 |
| N | -1.5442145  | 2.8028756  | 1.2432666  |
| O | -12.2033459 | 4.9211301  | -0.3525800 |
| H | -11.3575588 | 4.4328962  | -0.2216906 |
| H | -12.6358604 | 4.4780016  | -1.0905476 |
| O | 0.8156445   | 4.5782704  | 1.5206712  |
| H | 0.0554998   | 3.9796778  | 1.4326546  |
| H | 1.3934412   | 4.3566232  | 0.7820377  |
| O | -3.5038103  | -3.1740546 | -0.1216824 |
| H | -3.2700454  | -3.5970768 | -0.9565117 |
| H | -2.8048180  | -2.5166647 | 0.0482400  |

## KETO-3H<sub>2</sub>O\_COSMO (Isomer I)

### S<sub>1</sub> state

34

|   |             |            |            |
|---|-------------|------------|------------|
| C | -8.6764379  | 3.8847232  | -0.5845342 |
| C | -7.4348355  | 3.2734601  | -0.5655288 |
| C | -7.2872796  | 2.0291013  | 0.0708575  |
| C | -8.4339729  | 1.4760269  | 0.6635927  |
| C | -9.6306421  | 2.1709412  | 0.6033469  |
| N | -9.7628975  | 3.3535306  | -0.0099335 |
| C | -5.9705253  | 1.3887607  | 0.1500295  |
| C | -4.8562856  | 2.2070065  | 0.3977081  |
| C | -3.5642671  | 1.6155071  | 0.5616181  |
| C | -3.4310924  | 0.1970204  | 0.4832901  |
| N | -4.5611550  | -0.5410367 | 0.2174503  |
| C | -5.8132656  | -0.0205767 | -0.0011202 |
| H | -8.8096922  | 4.8397748  | -1.0767616 |
| H | -6.5973505  | 3.7462072  | -1.0564609 |
| H | -8.3912799  | 0.5405177  | 1.1996294  |
| H | -10.5200514 | 1.7683773  | 1.0712929  |
| H | -4.9790132  | 3.2657363  | 0.5544369  |
| C | -2.4252571  | 2.3733895  | 0.8545519  |
| O | -2.3498660  | -0.4228587 | 0.6366397  |
| H | -4.4085974  | -1.5553180 | 0.1195908  |
| C | -6.8485495  | -1.0015235 | -0.4321845 |
| H | -7.7087536  | -0.5151281 | -0.8794984 |
| H | -7.1999325  | -1.6154911 | 0.4056739  |
| H | -6.4301963  | -1.6874790 | -1.1729392 |
| N | -1.4949718  | 3.0296718  | 1.0874899  |
| O | -12.1885512 | 4.8591826  | 0.0226249  |
| H | -11.3639726 | 4.3226663  | 0.0008952  |
| H | -12.6470991 | 4.6470006  | -0.7975276 |
| O | 0.8933110   | 4.6620494  | 1.5441926  |
| H | 0.0936783   | 4.1268508  | 1.3939821  |
| H | 1.6278217   | 4.0643984  | 1.3657851  |
| O | -4.0121998  | -3.3463378 | 0.0266545  |
| H | -4.3742398  | -3.9038907 | -0.6726270 |
| H | -3.0613119  | -3.5104900 | 0.0094880  |



## KETO-3H<sub>2</sub>O\_COSMO (Isomer II)

### S<sub>0</sub> state

34

|   |             |            |            |
|---|-------------|------------|------------|
| C | -9.3703615  | 2.6946622  | -1.0243294 |
| C | -8.1859778  | 1.9732023  | -0.9917676 |
| C | -7.3641475  | 2.0607125  | 0.1339329  |
| C | -7.7867447  | 2.8914591  | 1.1749512  |
| C | -8.9864055  | 3.5769880  | 1.0532205  |
| N | -9.7735318  | 3.4855817  | -0.0242412 |
| C | -6.0666218  | 1.3441718  | 0.2217218  |
| C | -4.9003434  | 2.0697780  | 0.5186162  |
| C | -3.6606263  | 1.4702613  | 0.6023593  |
| C | -3.5157037  | 0.0496247  | 0.3981141  |
| N | -4.7184882  | -0.5938286 | 0.1311482  |
| C | -5.9440510  | -0.0266505 | 0.0344004  |
| H | -10.0185807 | 2.6431807  | -1.8902405 |
| H | -7.9070465  | 1.3700158  | -1.8434495 |
| H | -7.1998464  | 2.9964559  | 2.0766598  |
| H | -9.3335108  | 4.2204066  | 1.8520160  |
| H | -4.9731210  | 3.1378900  | 0.6717541  |
| C | -2.4946910  | 2.2260601  | 0.8804957  |
| O | -2.4586485  | -0.5915663 | 0.4513683  |
| H | -4.6258035  | -1.6088978 | 0.0117958  |
| C | -7.0694669  | -0.9682519 | -0.2588537 |
| H | -8.0136935  | -0.5855373 | 0.1168669  |
| H | -6.8786112  | -1.9406390 | 0.1930939  |
| H | -7.1672672  | -1.1162070 | -1.3363222 |
| N | -1.5471288  | 2.8448853  | 1.1025157  |
| O | -12.2369007 | 4.8880921  | -0.2834813 |
| H | -11.3855427 | 4.4032300  | -0.1779102 |
| H | -12.9215000 | 4.2237904  | -0.1493981 |
| O | 0.7223469   | 4.7074337  | 1.5201298  |
| H | 0.0074635   | 4.0643717  | 1.3820574  |
| H | 1.5305403   | 4.2364968  | 1.2893833  |
| O | -3.5083565  | -3.1914947 | 0.0690236  |
| H | -3.3101777  | -3.6707750 | -0.7441042 |
| H | -2.8041241  | -2.5245300 | 0.1626270  |

## KETO-3H<sub>2</sub>O\_COSMO (Isomer II)

### S<sub>1</sub> state

34

|   |             |            |            |
|---|-------------|------------|------------|
| C | -9.3916434  | 2.3511304  | -0.9752758 |
| C | -8.1900009  | 1.6705213  | -0.8687864 |
| C | -7.3088468  | 1.9911975  | 0.1762263  |
| C | -7.7180375  | 2.9964129  | 1.0689449  |
| C | -8.9439461  | 3.6126311  | 0.8855800  |
| N | -9.7747151  | 3.3058105  | -0.1185054 |
| C | -5.9892499  | 1.3658545  | 0.3159320  |
| C | -4.9063382  | 2.1913932  | 0.6583887  |
| C | -3.5890126  | 1.6394407  | 0.7347727  |
| C | -3.3920839  | 0.2606611  | 0.4244723  |
| N | -4.4990794  | -0.4923802 | 0.1095266  |
| C | -5.7925212  | -0.0296529 | 0.0936757  |
| H | -10.0759508 | 2.1275994  | -1.7834502 |
| H | -7.9296927  | 0.9334577  | -1.6126508 |
| H | -7.0966690  | 3.2787556  | 1.9058435  |
| H | -9.2744300  | 4.3862108  | 1.5671515  |
| H | -5.0446179  | 3.2530234  | 0.7788360  |
| C | -2.4693309  | 2.4170818  | 1.0501389  |
| O | -2.2747668  | -0.3126950 | 0.4249784  |
| H | -4.3147562  | -1.4900893 | -0.0731329 |
| C | -6.8405987  | -1.0716703 | -0.0968740 |
| H | -7.8298336  | -0.7060203 | 0.1564304  |
| H | -6.6304109  | -1.9359361 | 0.5390708  |
| H | -6.8651780  | -1.4352621 | -1.1312274 |
| N | -1.5603279  | 3.0865011  | 1.3253527  |
| O | -12.1912774 | 4.7506188  | -0.6311743 |
| H | -11.3726626 | 4.2434524  | -0.4304568 |
| H | -12.9138203 | 4.1942833  | -0.3219885 |
| O | 0.8332342   | 4.7373489  | 1.6561192  |
| H | 0.0311712   | 4.1954314  | 1.5508365  |
| H | 1.5495664   | 4.1838426  | 1.3265076  |
| O | -3.8919676  | -3.2511292 | -0.3578862 |
| H | -4.3851971  | -3.7599494 | -1.0128794 |
| H | -2.9637296  | -3.3779048 | -0.5895567 |

## ENOL-3H<sub>2</sub>O\_COSMO (Isomer I)

### S<sub>0</sub> state

34

|   |            |            |            |
|---|------------|------------|------------|
| C | -2.5064518 | 2.3236262  | -1.0402206 |
| C | -1.2785471 | 1.6796430  | -1.0177749 |
| C | -1.0893556 | 0.5974861  | -0.1548937 |
| C | -2.1665931 | 0.2201580  | 0.6500763  |
| C | -3.3592901 | 0.9226288  | 0.5590027  |
| N | -3.5356753 | 1.9588968  | -0.2683425 |
| C | 0.2284772  | -0.0838885 | -0.0780211 |
| C | 1.3677746  | 0.6769918  | 0.1654079  |
| C | 2.6168354  | 0.0717526  | 0.2623963  |
| C | 2.6829828  | -1.3280636 | 0.1071939  |
| N | 1.6017452  | -2.0500286 | -0.1558297 |
| C | 0.3961389  | -1.4713287 | -0.2572149 |
| H | -2.6746936 | 3.1609412  | -1.7064169 |
| H | -0.4867328 | 2.0132244  | -1.6737191 |
| H | -2.0802740 | -0.5961763 | 1.3524741  |
| H | -4.2053084 | 0.6494220  | 1.1776885  |
| H | 1.2900459  | 1.7473505  | 0.2942906  |
| C | 3.7888240  | 0.8293977  | 0.5159683  |
| O | 3.8637833  | -1.9316500 | 0.2189513  |
| C | -0.7339580 | -2.4001519 | -0.5963464 |
| H | -0.3665421 | -3.1971647 | -1.2398304 |
| H | -1.1291642 | -2.8658961 | 0.3096537  |
| H | -1.5530421 | -1.8857480 | -1.0919164 |
| N | 4.7367680  | 1.4533077  | 0.7203657  |
| H | 3.7517974  | -2.9135255 | 0.0876362  |
| O | -5.9147547 | 3.4826299  | -0.4699234 |
| H | -6.3885673 | 3.1105124  | -1.2215960 |
| H | -5.0998057 | 2.9338047  | -0.3848674 |
| O | 3.1261109  | -4.4841984 | -0.1000402 |
| H | 2.2584710  | -4.0817405 | -0.2833843 |
| H | 3.3671546  | -4.9782221 | -0.8934284 |
| O | 7.0692876  | 3.2908047  | 0.8919967  |
| H | 7.8357380  | 2.7894220  | 0.5925713  |
| H | 6.3267271  | 2.6666735  | 0.8449358  |

## ENOL-3H<sub>2</sub>O\_COSMO (Isomer I)

### S<sub>1</sub> state

34

|   |            |            |            |
|---|------------|------------|------------|
| C | -2.4725094 | 2.4495831  | -0.7974193 |
| C | -1.2335605 | 1.8364268  | -0.8027830 |
| C | -1.0834267 | 0.5553764  | -0.2190655 |
| C | -2.2365064 | -0.0005214 | 0.3793228  |
| C | -3.4257254 | 0.7024102  | 0.3500193  |
| N | -3.5578439 | 1.9052463  | -0.2313023 |
| C | 0.2107072  | -0.0968169 | -0.2008671 |
| C | 1.3672986  | 0.7389994  | -0.1038084 |
| C | 2.6369926  | 0.1289177  | 0.0494593  |
| C | 2.6579680  | -1.3076051 | 0.0701393  |
| N | 1.5956685  | -2.0811877 | -0.1092445 |
| C | 0.3650605  | -1.5177398 | -0.2675746 |
| H | -2.6049639 | 3.4200339  | -1.2586089 |
| H | -0.3988298 | 2.3230755  | -1.2825852 |
| H | -2.1940917 | -0.9460471 | 0.8951958  |
| H | -4.3129329 | 0.2947881  | 0.8166144  |
| H | 1.2686165  | 1.8042069  | 0.0202860  |
| C | 3.8086561  | 0.8550209  | 0.2720938  |
| O | 3.8261006  | -1.8835472 | 0.2824698  |
| C | -0.7116297 | -2.4910309 | -0.6329447 |
| H | -0.3069267 | -3.2166923 | -1.3415561 |
| H | -1.0410571 | -3.0635711 | 0.2423488  |
| H | -1.5804549 | -2.0235141 | -1.0851909 |
| N | 4.7714105  | 1.4877387  | 0.4450138  |
| H | 3.7169106  | -2.8902131 | 0.2788289  |
| O | -5.9968593 | 3.4305914  | -0.2340493 |
| H | -6.3189125 | 3.4185223  | -1.1418378 |
| H | -5.1786211 | 2.8878275  | -0.2433447 |
| O | 3.1965326  | -4.4197938 | 0.2513121  |
| H | 2.3053312  | -4.1184511 | -0.0030429 |
| H | 3.5090800  | -4.9871795 | -0.4648527 |
| O | 7.0660943  | 3.2366677  | 0.8721876  |
| H | 7.8128943  | 2.6446880  | 1.0128713  |
| H | 6.3033565  | 2.6472603  | 0.7289462  |

## ENOL-3H<sub>2</sub>O\_COSMO (Isomer II)

### S<sub>0</sub> state

34

|   |            |            |            |
|---|------------|------------|------------|
| C | -3.0823926 | 1.1353401  | -1.3855053 |
| C | -1.8791119 | 0.4511849  | -1.3031609 |
| C | -1.0952080 | 0.5833266  | -0.1552720 |
| C | -1.5786114 | 1.4103401  | 0.8612180  |
| C | -2.7964281 | 2.0545274  | 0.6918153  |
| N | -3.5433812 | 1.9261016  | -0.4099531 |
| C | 0.2268323  | -0.0850985 | -0.0343348 |
| C | 1.3588003  | 0.6892475  | 0.1960731  |
| C | 2.6163631  | 0.0977845  | 0.2762916  |
| C | 2.6958555  | -1.3008223 | 0.1206838  |
| N | 1.6124032  | -2.0439563 | -0.0645506 |
| C | 0.3988522  | -1.4792181 | -0.1425692 |
| H | -3.6990885 | 1.0530319  | -2.2719833 |
| H | -1.5543147 | -0.1574729 | -2.1343059 |
| H | -1.0239436 | 1.5471446  | 1.7787689  |
| H | -3.1898392 | 2.6968214  | 1.4700236  |
| H | 1.2720241  | 1.7617978  | 0.2975035  |
| C | 3.7896578  | 0.8658473  | 0.4859920  |
| O | 3.8910234  | -1.8841465 | 0.1724210  |
| C | -0.7458966 | -2.4321472 | -0.3312790 |
| H | -0.9160561 | -2.6172527 | -1.3946476 |
| H | -0.5049886 | -3.3858448 | 0.1339975  |
| H | -1.6708823 | -2.0484264 | 0.0921726  |
| N | 4.7454560  | 1.4897857  | 0.6489438  |
| H | 3.7892098  | -2.8678425 | 0.0520273  |
| O | -5.9917828 | 3.2929056  | -0.9181839 |
| H | -6.6715158 | 2.6103763  | -0.9093707 |
| H | -5.1517301 | 2.8214014  | -0.7118093 |
| O | 3.1798044  | -4.4523482 | -0.1126195 |
| H | 2.2980397  | -4.0627332 | -0.2504530 |
| H | 3.3879838  | -4.9445680 | -0.9162222 |
| O | 7.0499249  | 3.3361980  | 0.9457892  |
| H | 7.8486979  | 2.7993930  | 0.9915762  |
| H | 6.3224092  | 2.6988463  | 0.8567968  |

## ENOL-3H<sub>2</sub>O\_COSMO (Isomer II)

### S<sub>1</sub> state

34

|   |            |            |            |
|---|------------|------------|------------|
| C | -3.1976968 | 0.8297149  | -1.2257806 |
| C | -2.0231989 | 0.1192619  | -1.0684531 |
| C | -1.0922076 | 0.5213931  | -0.0846737 |
| C | -1.4370509 | 1.6598971  | 0.6817978  |
| C | -2.6498730 | 2.2871482  | 0.4640431  |
| N | -3.5218015 | 1.8930437  | -0.4740484 |
| C | 0.1847502  | -0.1386079 | 0.0999426  |
| C | 1.3034106  | 0.6796488  | 0.4500582  |
| C | 2.5952119  | 0.0973499  | 0.4534321  |
| C | 2.6661463  | -1.3026231 | 0.1321843  |
| N | 1.6156055  | -2.0819392 | -0.0854512 |
| C | 0.3629773  | -1.5456585 | -0.0874922 |
| H | -3.9108660 | 0.5464484  | -1.9892126 |
| H | -1.8109424 | -0.7063938 | -1.7282818 |
| H | -0.7793356 | 2.0230777  | 1.4564413  |
| H | -2.9364035 | 3.1457264  | 1.0575692  |
| H | 1.1993940  | 1.7486792  | 0.5311616  |
| C | 3.7630344  | 0.8372652  | 0.6493594  |
| O | 3.8710792  | -1.8351964 | 0.0540428  |
| C | -0.7406772 | -2.5530931 | -0.1675495 |
| H | -0.8373033 | -2.9573251 | -1.1822420 |
| H | -0.4963945 | -3.3994628 | 0.4784509  |
| H | -1.7046120 | -2.1599751 | 0.1399035  |
| N | 4.7195824  | 1.4760656  | 0.8351633  |
| H | 3.7971019  | -2.8140197 | -0.1956191 |
| O | -5.9521020 | 3.2975254  | -1.1023511 |
| H | -6.6720344 | 2.6922046  | -0.8949595 |
| H | -5.1322395 | 2.8167643  | -0.8556094 |
| O | 3.3250176  | -4.3294497 | -0.4988672 |
| H | 2.3955455  | -4.0380265 | -0.5320630 |
| H | 3.5254674  | -4.7030395 | -1.3664008 |
| O | 7.0337196  | 3.2556282  | 0.8847454  |
| H | 7.7880530  | 2.7006638  | 1.1106785  |
| H | 6.2699805  | 2.6504671  | 0.8743590  |

## ANION-3H<sub>2</sub>O\_COSMO (Isomer I)

### S<sub>0</sub> state

33

|   |             |            |            |
|---|-------------|------------|------------|
| C | -8.7384442  | 4.0171802  | -0.3595221 |
| C | -7.5206286  | 3.3577315  | -0.3902193 |
| C | -7.3945574  | 2.0962980  | 0.2083610  |
| C | -8.5424867  | 1.5811193  | 0.8238186  |
| C | -9.7228808  | 2.3066302  | 0.7957263  |
| N | -9.8347055  | 3.5077459  | 0.2155517  |
| C | -6.0985521  | 1.3844555  | 0.2084839  |
| C | -4.9318419  | 2.0949455  | 0.4803860  |
| C | -3.6962554  | 1.4623104  | 0.5075464  |
| C | -3.6058229  | 0.0377822  | 0.2694118  |
| N | -4.7708952  | -0.6132386 | -0.0535325 |
| C | -5.9466352  | 0.0032499  | -0.0850984 |
| H | -8.8462538  | 4.9899161  | -0.8238204 |
| H | -6.6824536  | 3.8172144  | -0.8951720 |
| H | -8.5220449  | 0.6309777  | 1.3360586  |
| H | -10.6178247 | 1.9145845  | 1.2632975  |
| H | -4.9839462  | 3.1549208  | 0.6916044  |
| C | -2.5155119  | 2.1879227  | 0.7810850  |
| O | -2.5172743  | -0.5908234 | 0.3367254  |
| C | -7.1056375  | -0.8687387 | -0.5021875 |
| H | -6.7364620  | -1.6617795 | -1.1491151 |
| H | -7.5679011  | -1.3414873 | 0.3678291  |
| H | -7.8780133  | -0.3093877 | -1.0256729 |
| N | -1.5478036  | 2.7842710  | 0.9958725  |
| O | -12.3100170 | 4.8715161  | 0.1744158  |
| H | -11.4438027 | 4.3975495  | 0.1877677  |
| H | -12.7383014 | 4.5862903  | -0.6399170 |
| O | -3.4352318  | -3.1803201 | -0.2241227 |
| H | -4.2506103  | -2.6514712 | -0.2804727 |
| H | -2.8201025  | -2.4503003 | -0.0121392 |
| O | 0.9045047   | 4.4129973  | 0.9232081  |
| H | 0.1002810   | 3.8658026  | 0.9539361  |
| H | 1.4513457   | 4.0128015  | 0.2382799  |

## ANION-3H<sub>2</sub>O\_COSMO (Isomer II)

### S<sub>0</sub> state

33

|   |             |            |            |
|---|-------------|------------|------------|
| C | -9.5895361  | 2.5826936  | -0.7834103 |
| C | -8.4102613  | 1.8547851  | -0.8021699 |
| C | -7.4557762  | 2.0537275  | 0.2028972  |
| C | -7.7664235  | 3.0087216  | 1.1804118  |
| C | -8.9672949  | 3.6967997  | 1.1145104  |
| N | -9.8769254  | 3.4941332  | 0.1536618  |
| C | -6.1572616  | 1.3453296  | 0.2238647  |
| C | -4.9922649  | 2.0762461  | 0.4427364  |
| C | -3.7486784  | 1.4598348  | 0.4392673  |
| C | -3.6422042  | 0.0358931  | 0.1972565  |
| N | -4.8214740  | -0.6551933 | 0.0418705  |
| C | -6.0066834  | -0.0549216 | 0.0482218  |
| H | -10.3333043 | 2.4379764  | -1.5575962 |
| H | -8.2353328  | 1.1567617  | -1.6073380 |
| H | -7.0848667  | 3.2070760  | 1.9959265  |
| H | -9.2174153  | 4.4360236  | 1.8658715  |
| H | -5.0490996  | 3.1457638  | 0.5975167  |
| C | -2.5674626  | 2.2065086  | 0.6403658  |
| O | -2.5374984  | -0.5596867 | 0.1404117  |
| C | -7.1892995  | -0.9790876 | -0.1040486 |
| H | -6.9290096  | -1.9596832 | 0.2894559  |
| H | -8.0729888  | -0.6090953 | 0.4120338  |
| H | -7.4487253  | -1.1055957 | -1.1580023 |
| N | -1.5992214  | 2.8173836  | 0.8048804  |
| O | -12.3409565 | 4.8794037  | 0.2079100  |
| H | -11.4799433 | 4.3964549  | 0.1785092  |
| H | -12.8944236 | 4.3649397  | 0.8054708  |
| O | -3.5491009  | -3.1813783 | -0.3843995 |
| H | -4.2824755  | -2.5406406 | -0.2850610 |
| H | -2.8129022  | -2.5621334 | -0.2415330 |
| O | 0.9114633   | 4.3207250  | 0.9022237  |
| H | 0.0815482   | 3.8124619  | 0.8781772  |
| H | 1.5938532   | 3.6956795  | 0.6348750  |



## ANION-3H<sub>2</sub>O\_COSMO

### TICT state

33

|   |             |            |            |
|---|-------------|------------|------------|
| C | -9.2900637  | 3.2138095  | -1.0014017 |
| C | -8.0188952  | 2.7104693  | -1.0391442 |
| C | -7.4326394  | 2.1849921  | 0.1562181  |
| C | -8.2366478  | 2.2377379  | 1.3369423  |
| C | -9.4988352  | 2.7608917  | 1.2720981  |
| N | -10.0773404 | 3.2625376  | 0.1262925  |
| C | -6.0685743  | 1.6338396  | 0.1708253  |
| C | -4.9584590  | 2.4372542  | 0.4207410  |
| C | -3.6839987  | 1.8861125  | 0.4558352  |
| C | -3.4998032  | 0.4555473  | 0.2251360  |
| N | -4.6075943  | -0.3213694 | -0.0360232 |
| C | -5.8099439  | 0.2152269  | -0.0722117 |
| H | -9.7361183  | 3.6124715  | -1.9051203 |
| H | -7.4752103  | 2.7198731  | -1.9757244 |
| H | -7.8655968  | 1.8726192  | 2.2868837  |
| H | -10.1112611 | 2.7992841  | 2.1650295  |
| H | -5.1038873  | 3.4932967  | 0.5944235  |
| C | -2.5385524  | 2.6736721  | 0.7223006  |
| O | -2.3675528  | -0.0617644 | 0.2601354  |
| C | -6.9659938  | -0.6832019 | -0.3584744 |
| H | -6.6238881  | -1.6871989 | -0.5944643 |
| H | -7.6333515  | -0.7126634 | 0.5044898  |
| H | -7.5620748  | -0.2827954 | -1.1777965 |
| N | -1.6064474  | 3.3189698  | 0.9426098  |
| O | -12.7324956 | 3.5548969  | -0.1033745 |
| H | -11.7229221 | 3.4885078  | -0.0004370 |
| H | -12.9992159 | 2.6658098  | -0.3597342 |
| O | -3.9445596  | -3.1000685 | -0.7361503 |
| H | -4.2068532  | -2.2010700 | -0.4536200 |
| H | -4.6648659  | -3.6799914 | -0.4660763 |
| O | 1.2574441   | 3.6683868  | 1.8993827  |
| H | 0.3412138   | 3.7755115  | 1.6071689  |
| H | 1.5489224   | 4.5529859  | 2.1479299  |

## CATION-3H<sub>2</sub>O\_COSMO (Isomer I)

### S<sub>0</sub> state

35

|   |            |            |            |
|---|------------|------------|------------|
| C | -1.6784595 | 2.7363708  | -0.7302438 |
| C | -0.5642571 | 1.9307869  | -0.7501653 |
| C | -0.5897995 | 0.6796673  | -0.1162502 |
| C | -1.7750152 | 0.3008242  | 0.5298467  |
| C | -2.8636224 | 1.1413640  | 0.5207165  |
| N | -2.7941068 | 2.3275381  | -0.1044610 |
| C | 0.6168749  | -0.1714446 | -0.0923741 |
| C | 1.8478419  | 0.4252837  | 0.1792015  |
| C | 2.9974126  | -0.3478439 | 0.2711675  |
| C | 2.8703136  | -1.7425037 | 0.0875032  |
| N | 1.7119633  | -2.3007871 | -0.2339613 |
| C | 0.6009394  | -1.5631881 | -0.3352467 |
| H | -1.7176928 | 3.7033116  | -1.2058822 |
| H | 0.3159142  | 2.2738950  | -1.2716562 |
| H | -1.8495596 | -0.6332364 | 1.0624265  |
| H | -3.7969810 | 0.9038313  | 1.0059829  |
| H | 1.9300528  | 1.4933163  | 0.3349027  |
| C | 4.2568981  | 0.2385113  | 0.5637064  |
| O | 3.9438766  | -2.5065878 | 0.2291206  |
| C | -0.6259374 | -2.3186381 | -0.7632719 |
| H | -0.3272022 | -3.1370739 | -1.4145291 |
| H | -1.1264439 | -2.7584875 | 0.1023648  |
| H | -1.3423985 | -1.6891099 | -1.2849341 |
| N | 5.2753752  | 0.7258512  | 0.8015537  |
| H | 3.7107419  | -3.4715370 | 0.1053321  |
| O | -5.0255959 | 3.9396317  | -0.0792992 |
| H | -5.0120666 | 4.7262914  | 0.4794924  |
| H | -3.6277660 | 2.9507122  | -0.1032442 |
| O | 3.3688275  | -5.0922971 | 0.0327536  |
| H | 2.5601341  | -5.2333825 | -0.4749263 |
| H | 4.0264323  | -5.6872603 | -0.3487487 |
| O | 3.2205731  | 3.3948260  | 0.1280696  |
| H | 3.0842987  | 4.3260577  | 0.3386893  |
| H | 4.1180446  | 3.2069092  | 0.4273704  |
| H | -5.3964725 | 4.2257346  | -0.9226373 |

## CATION-3H<sub>2</sub>O\_COSMO (Isomer II)

### S<sub>0</sub> state

35

|   |            |            |            |
|---|------------|------------|------------|
| C | -3.0085162 | 1.3547624  | -1.2309235 |
| C | -1.9046981 | 0.5353381  | -1.1853889 |
| C | -0.9383663 | 0.7157735  | -0.1859443 |
| C | -1.1438342 | 1.7481111  | 0.7413757  |
| C | -2.2636174 | 2.5413676  | 0.6529462  |
| N | -3.1636892 | 2.3291287  | -0.3204226 |
| C | 0.2880922  | -0.1059409 | -0.1267580 |
| C | 1.5102607  | 0.5369013  | 0.0671897  |
| C | 2.6915960  | -0.1923864 | 0.0807508  |
| C | 2.6065071  | -1.5908028 | -0.0992792 |
| N | 1.4410204  | -2.2072647 | -0.2331978 |
| C | 0.2974156  | -1.5133278 | -0.2483106 |
| H | -3.7771041 | 1.2688100  | -1.9824224 |
| H | -1.7914372 | -0.2202887 | -1.9455003 |
| H | -0.4407843 | 1.9272823  | 1.5400644  |
| H | -2.4750360 | 3.3439918  | 1.3415168  |
| H | 1.5644714  | 1.6106581  | 0.1964347  |
| C | 3.9467947  | 0.4477443  | 0.2558469  |
| O | 3.7253978  | -2.3004286 | -0.1205112 |
| C | -0.9494567 | -2.3450753 | -0.3589857 |
| H | -1.1957066 | -2.5282028 | -1.4076275 |
| H | -0.7720159 | -3.3121025 | 0.1059599  |
| H | -1.8085838 | -1.8731161 | 0.1114948  |
| N | 4.9601937  | 0.9814086  | 0.3965540  |
| H | 3.5320575  | -3.2747606 | -0.2390044 |
| H | -4.0055805 | 2.9392128  | -0.3756353 |
| O | -5.4121919 | 3.8903523  | -0.5697076 |
| H | -6.1126088 | 3.8149434  | 0.0897457  |
| H | -5.3063620 | 4.8361069  | -0.7294381 |
| O | 3.3603780  | -4.9204360 | -0.3679926 |
| H | 2.5461861  | -5.1647089 | -0.8251975 |
| H | 4.0665728  | -5.3994290 | -0.8200855 |
| O | 2.6471958  | 3.4967649  | 1.0242423  |
| H | 3.5889019  | 3.3326982  | 0.8947432  |
| H | 2.5003819  | 4.3756093  | 0.6552463  |

## CATION-3H<sub>2</sub>O\_COSMO

### TICT state

35

|   |            |            |            |
|---|------------|------------|------------|
| C | -1.9779965 | 2.1233972  | -1.6443850 |
| C | -0.8848988 | 1.3181725  | -1.5686887 |
| C | -0.4827213 | 0.7750493  | -0.3163175 |
| C | -1.2370495 | 1.1215200  | 0.8391665  |
| C | -2.3250323 | 1.9287380  | 0.7255152  |
| N | -2.7051031 | 2.4237097  | -0.5079817 |
| C | 0.7208700  | -0.0749225 | -0.2090353 |
| C | 1.9808328  | 0.4832349  | 0.0108790  |
| C | 3.0915996  | -0.3409481 | 0.1045680  |
| C | 2.8978721  | -1.7687310 | -0.0208364 |
| N | 1.6987124  | -2.3191093 | -0.2298576 |
| C | 0.6377448  | -1.5331077 | -0.3280207 |
| H | -2.3240447 | 2.5586107  | -2.5670385 |
| H | -0.3364256 | 1.1065533  | -2.4750796 |
| H | -0.9657676 | 0.7556279  | 1.8188300  |
| H | -2.9309565 | 2.2178028  | 1.5681250  |
| H | 2.0983691  | 1.5571972  | 0.1146390  |
| C | 4.3969031  | 0.1644544  | 0.3236760  |
| O | 3.9389824  | -2.5302018 | 0.0795504  |
| C | -0.6761019 | -2.1759971 | -0.5629071 |
| H | -0.5676908 | -3.2535701 | -0.6356357 |
| H | -1.3663451 | -1.9168984 | 0.2425856  |
| H | -1.1319602 | -1.7747963 | -1.4700258 |
| N | 5.4650547  | 0.5627338  | 0.5007411  |
| H | 3.7019193  | -3.5530991 | 0.0104354  |
| O | -5.1742417 | 4.0559822  | -0.3112734 |
| H | -5.0690064 | 4.6719900  | 0.4236646  |
| H | -3.5255423 | 3.0195930  | -0.5674792 |
| O | 3.4351187  | -4.9807198 | 0.0425156  |
| H | 2.5957056  | -5.2436116 | -0.3570233 |
| H | 4.1065294  | -5.5849889 | -0.3013147 |
| O | 2.8718898  | 3.5217594  | 0.5642707  |
| H | 2.2986933  | 3.8515744  | 1.2677284  |
| H | 2.6580493  | 4.0798612  | -0.1940770 |
| H | -5.8830391 | 3.4620190  | -0.0361227 |
